# Supplementary material
Source: PubMed Central journal article supplement (PMC8640339)
Supplement: sj-pdf-1-jdr-10.1177_00220345211014432.pdf [file sj-pdf-1-jdr-10.1177_00220345211014432.pdf]

## The Human Salivary Proteome Wiki: A Community-Driven Research Platform

**Authors:** William W. Lau, Markus Hardt, Yanhui H. Zhang, Marcelo Freire, and Stefan Ruhl

**Appendix Table 1. Sources and description of datasets that have been deposited into the HSP Wiki repository**

| Institution                                           | Experiment            | Secretion                     | Healthy/Disease     | Dataset Count | Publication <sup>a</sup> |
|-------------------------------------------------------|-----------------------|-------------------------------|---------------------|---------------|--------------------------|
| <b>Forsyth Institute</b>                              | MS <sup>b</sup>       | Major glands                  | Healthy             | 36            | Schulte <i>et al.</i>    |
| <b>J. Craig Venter Institute</b>                      | MS                    | Whole Saliva                  | Healthy/Oral Cancer | 30            | Lin <i>et al.</i>        |
| <b>Scripps Research Institute (HSPP<sup>c</sup>)</b>  | MS                    | Major glands                  | Healthy             | 2             | Denny <i>et al.</i>      |
| <b>University at Buffalo</b>                          | 2-D PAGE <sup>d</sup> | Major glands/<br>Whole Saliva | Healthy             | 3             | Walz <i>et al.</i>       |
| <b>University Medicine Greifswald</b>                 | MS                    | Whole Saliva                  | Healthy             | 206           | Murr <i>et al.</i>       |
| <b>University of California, Los Angeles (HSPP)</b>   | MS                    | Major glands                  | Healthy             | 467           | Denny <i>et al.</i>      |
| <b>University of California, San Francisco</b>        | MS                    | Whole Saliva                  | Sjögren's Syndrome  | 7             | Hall <i>et al.</i>       |
| <b>University of California, San Francisco (HSPP)</b> | MS                    | Major glands                  | Healthy             | 87            | Denny <i>et al.</i>      |

<sup>a</sup>See Appendix References; <sup>b</sup>MS, Mass Spectrometry; <sup>c</sup>HSPP, Participant in the Human Salivary Proteome Project; <sup>d</sup>2-D PAGE, Two-dimensional SDS polyacrylamide gel electrophoresis.

**Appendix Table 2. Individual elements comprising a protein annotation**

| Field               | Label       | Required | Description                                                                                                               |
|---------------------|-------------|----------|---------------------------------------------------------------------------------------------------------------------------|
| Subject             | Protein     | Yes      | The protein being annotated                                                                                               |
| Annotation Type     | Feature key | Yes      | Aspect of the protein being annotated choosing from one of the options adopted from the UniProt framework                 |
| Description         |             | No       | The annotation value using either free-text or terms from ontologies, such as GO or KEGG                                  |
| Evidence Code       |             | Yes      | A code that indicates whether the annotation is inferred experimental results, computational analysis, or expert opinions |
| Evidence References |             | No       | One or more literature references from which the annotation is derived                                                    |
| Scope               | Variant     | No       | A specific sequence, if applicable, to which the annotation applies                                                       |
| Start Position      | Starts at   | No       | An integer that specifies the starting position of the sequence region being annotated                                    |
| End Position        | Ends at     | No       | An integer that specifies the end position of the sequence region being annotated                                         |
| Annotation Source   | Reported by | Yes      | The knowledge base, algorithm used, or the person who contributed the annotation                                          |

**Appendix References**

Schulte F, Hasturk H, Hardt M. 2019. Mapping Relative Differences in Human Salivary Gland Secretions by Dried Saliva Spot Sampling and nanoLC-MS/MS. *Proteomics*. 19(20):e1900023.

Lin Y-H, Eguez RV, Torralba MG, Singh H, Golusinski P, Golusinski W, Masternak M, Nelson KE, Freire M, Yu Y. 2019. Self-Assembled STrap for Global Proteomics and Salivary Biomarker Discovery. *J Proteome Res*. 18(4):1907–1915.

Walz A, Stühler K, Wattenberg A, Hawranke E, Meyer HE, Schmalz G, Blüggel M, Ruhl S. 2006. Proteome analysis of glandular parotid and submandibular-sublingual saliva in comparison to whole human saliva by two-dimensional gel electrophoresis. *Proteomics*. 6(5):1631–1639.

Murr A, Pink C, Hammer E, Michalik S, Dhople VM, Holtfreter B, Völker U, Kocher T, Gesell Salazar M. 2017. Cross-Sectional Association of Salivary Proteins with Age, Sex, Body Mass Index, Smoking, and Education. *J Proteome Res*. 16(6):2273–2281.

Hall SC, Hassis ME, Williams KE, Albertolle ME, Prakobphol A, Dykstra AB, Laurance M, Ona K, Niles RK, Prasad N, et al. 2017. Alterations in the Salivary Proteome and N-Glycome of Sjögren's Syndrome Patients. *J Proteome Res*. 16(4):1693–1705.

Denny P, Hagen FK, Hardt M, Liao L, Yan W, Arellanno M, Bassilian S, Bedi GS, Boontheung P, Cociorva D, et al. 2008. The proteomes of human parotid and submandibular/sublingual gland salivas collected as the ductal secretions. *J Proteome Res.* 7(5):1994–2006.
